# Supplementary material for: Characterising Biosecurity Initiatives Globally to Support the Development of a Progressive Management Pathway for Terrestrial Animals: A Scoping Review
Source: MDPI journal article supplement (doi:10.3390/ani13162672), 2023-08-19
Supplement: s1 [file s1]

## **Supplementary File S1 - Detailed Information on the Methodology of the Scoping Review and the Survey Questionnaires**

### ***1. Detailed methodology/ protocol***

#### ***1.1. Scoping review***

The review team consisted of one researcher (NM), who developed the protocol including the research questions, search strategy, eligibility criteria, data characteristics/classifications, screening, data extraction and summary in close consultation with the other authors (MM, AR, MH, SvD and MH).

##### ***1.1.1. Research questions***

- What biosecurity relevant literature exists at global scale and how is it distributed over time and space?
- What biosecurity-related aspects or contents may be important for sustainable biosecurity systems?
- What are the strengths, weaknesses, opportunities and threats of existing biosecurity systems, initiatives, programs, or projects?
- How can the generated information support the countries in progressively improving biosecurity in production systems and value chains, through the application of evidence based, One Health approaches?

##### ***1.1.2. Databases used***

- <https://pubmed.ncbi.nlm.nih.gov/> (accessed on 18.04.2022)
- <https://www.webofscience.com/wos/woscc/basic-search> (accessed on 18.04.2022)
- <https://www.fao.org/publications/search/en/> (accessed on 18.04.2022)
- <https://scholar.google.de/> (accessed on 18.04.2022)
- <https://www.ilri.org/publications> (accessed on 18.04.2022)
- <https://www.worldbank.org/en/research> (accessed on 18.04.2022)

##### ***1.1.3. Keywords and search query***

As stated below, the following keywords were used for performing the scoping literature review (Table S1), while the search query was performed on the 18 April 2022 and resulted in a total of 1350 literature reports (Table S2).

Table S1. Keywords used in this literature review.\* refers to open end of the keywords

| <b>Keywords 1 [title]</b> | <b>Keywords 2 [title and/or abstract]</b>                                                           | <b>Keywords 3 [title and/or abstract]</b>                                                   |
|---------------------------|-----------------------------------------------------------------------------------------------------|---------------------------------------------------------------------------------------------|
| Biosecurity               | Standard*<br>Guideline*<br>Approach*<br>Practic*<br>Implement*<br>Measurement*<br>Pathway*<br>Tool* | Animal<br>Agricultur*<br>Livestock<br>Disease*<br>Zoono*<br>Aqua*<br>Fish*<br>Public Health |

|  |                                                  |                                                     |
|--|--------------------------------------------------|-----------------------------------------------------|
|  | Initiative*<br>Program*<br>Compliance<br>System* | AMR<br>Wildlife<br>Plant*<br>Forest*<br>Food safety |
|--|--------------------------------------------------|-----------------------------------------------------|

Table S2. Search query and resulting publication counts in this literature review.

| Database       | Search query                                                                                                                                                                                                                                                                                                                                                                                                                                                                                                                                                                           | Searches<br>18.04.2022 |
|----------------|----------------------------------------------------------------------------------------------------------------------------------------------------------------------------------------------------------------------------------------------------------------------------------------------------------------------------------------------------------------------------------------------------------------------------------------------------------------------------------------------------------------------------------------------------------------------------------------|------------------------|
| PubMed         | (biosecurity[title]) AND<br>((standard*[tiab]) OR (guideline*[tiab]) OR (approach*[tiab])<br>OR (practice*[tiab]) OR (implement*[tiab]) OR<br>(measurement*[tiab]) OR (pathway* [tiab]) OR (tool*[tiab])<br>OR (initiative*[tiab]) OR (program* [tiab]) OR (compliance<br>[tiab]) OR (system*[tiab])) AND<br>((animal[tiab]) OR (agriculture*[tiab]) OR (livestock[tiab]) OR<br>(disease*[tiab]) OR (zoono*[tiab]) OR (aqua*[tiab]) OR<br>(fish*[tiab]) OR (public health[tiab]) OR (AMR[tiab]) OR<br>(wildlife[tiab]) OR (plant*[tiab]) OR (forest*[tiab]) OR (food<br>safety[tiab])) | 384                    |
| Web of Science | TI=(“biosecurity”) AND<br>(TS= (standard* OR guideline* OR approach* OR practice* OR<br>implement* OR measurement* OR pathway* OR tool* OR<br>initiative OR program* OR compliance OR system*)) AND<br>(TS=(animal OR agricultur* OR livestock OR disease* OR<br>zoono* OR aqua* OR fish* OR “public health” OR amr OR<br>wildlife OR plant* OR forest* OR “food safety”)                                                                                                                                                                                                              | 673                    |
| FAO            | Biosecurity (title only)                                                                                                                                                                                                                                                                                                                                                                                                                                                                                                                                                               | 56                     |
| Google scholar | allintitle: biosecurity system OR approach                                                                                                                                                                                                                                                                                                                                                                                                                                                                                                                                             | 210                    |
| ILRI           | Biosecurity (keyword)                                                                                                                                                                                                                                                                                                                                                                                                                                                                                                                                                                  | 18                     |
| World Bank     | Biosecurity (keyword, basic search)                                                                                                                                                                                                                                                                                                                                                                                                                                                                                                                                                    | 09                     |
| <b>TOTAL</b>   |                                                                                                                                                                                                                                                                                                                                                                                                                                                                                                                                                                                        | <b>1350</b>            |

The following literature search was performed by one person (NM) in close consultation with other authors (MM, AR, SvD, MD, and MH) and consisted of the following steps:

1. Number of records identified through database search, other sources (no exclusion)
2. Number of records after duplicates removed in EndNote (Version 20)
3. Export of reference into Rayyan (Rayyan Systems Inc.) [1]
4. First screening of abstracts and title for eligibility criteria (Table S3)
  - Screening of title and abstracts
  - Labeling of publication within Rayyan software
  - Exclusion reasons: wrong population, wrong intervention, wrong outcome or others.  
Also, publications were excluded if no title or abstract (or similar text) was available.
5. Export publication list into an excel file (Microsoft Office Excel)
6. Second screening of abstracts and title for information extraction in an excel file (Table S4):
  - Descriptive information
  - SWOT analysis (if applicable Table S5)

Table S3. Exclusion and inclusion criteria used regarding the PICO checklist as proposed in the PRISMA guidelines.

| Area                                              | Category      | Inclusion criteria                                                                                                                                                                                                                                                                                                                                                                                                                                                                                                                                                                                            | Exclusion criteria                                                                                                                                                                                                                                                                                                                                                                                                                                                                   |
|---------------------------------------------------|---------------|---------------------------------------------------------------------------------------------------------------------------------------------------------------------------------------------------------------------------------------------------------------------------------------------------------------------------------------------------------------------------------------------------------------------------------------------------------------------------------------------------------------------------------------------------------------------------------------------------------------|--------------------------------------------------------------------------------------------------------------------------------------------------------------------------------------------------------------------------------------------------------------------------------------------------------------------------------------------------------------------------------------------------------------------------------------------------------------------------------------|
| Implementation of biosecurity standards and tools | Population    | <ul style="list-style-type: none"> <li>• Biosecurity measurements/ frameworks/ systems in relation to sanitary, phytosanitary and zoonosanitary measures applied in food and agriculture regulatory systems</li> <li>• Global (LMIC and HIC)</li> <li>• Including all stakeholders of livestock value chains (farmers, traders/transporters, slaughters, retailers, consumers, ministries, communities, industry)</li> <li>• Including different animal-production systems (intensive, extensive, small-scale, nomadism&amp; transhumance)</li> <li>• Including endemic areas of specific diseases</li> </ul> | <ul style="list-style-type: none"> <li>• Biosecurity measurements in relation to laboratory work/ laboratory animals</li> <li>• Biosecurity measurements in relation to biological weapons and/or bioterrorism</li> </ul>                                                                                                                                                                                                                                                            |
|                                                   | Interventions | <ul style="list-style-type: none"> <li>• Biosecurity systems, approaches, programmes, policies, strategies, regulations, legislations, laws, pilots</li> <li>• Also referring to other prevention measures related to biosecurity practices such as on waste (water) management, vaccination</li> <li>• Biosecurity implementation on all intervention levels (local, national, global)</li> </ul>                                                                                                                                                                                                            | <ul style="list-style-type: none"> <li>• Evaluation of individual, single on-farm or off-farm level biosecurity practices (except if used for change strategies)</li> <li>• Outbreak related disease surveillance associated with biosecurity measures</li> <li>• Only risk/hazard/pest/disease identification or assessment or management</li> <li>• Background information and/or only theoretical recommendations (if not in accordance to a particular program/ case)</li> </ul> |
|                                                   | Outcome       | <ul style="list-style-type: none"> <li>• Effectiveness and/ or efficiency of implementation (Change of disease outbreaks&amp; their costs,</li> </ul>                                                                                                                                                                                                                                                                                                                                                                                                                                                         | <ul style="list-style-type: none"> <li>• Only determination of cost efficiencies</li> <li>• Only evaluation of stakeholder current</li> </ul>                                                                                                                                                                                                                                                                                                                                        |

|  |        |                                                                                                                                                                                                                                                                                                             |                                                                                                                          |
|--|--------|-------------------------------------------------------------------------------------------------------------------------------------------------------------------------------------------------------------------------------------------------------------------------------------------------------------|--------------------------------------------------------------------------------------------------------------------------|
|  |        | change of stakeholder behavior) on system level <ul style="list-style-type: none"> <li>• Reports on SWOTs: strengths, weaknesses, opportunities, threats</li> <li>• Reports on applicability, sustainability</li> </ul>                                                                                     | behavior, knowledge, attitudes (except behavior change strategies/interventions) unless referring to biosecurity project |
|  | Others | <ul style="list-style-type: none"> <li>• English language</li> <li>• Other languages if found by English keywords</li> <li>• Grey literature included (including book chapters)</li> <li>• Also secondary literature included if referring to biosecurity system/ initiative/ programme/ project</li> </ul> | <ul style="list-style-type: none"> <li>• Book reviews</li> <li>• Whole books</li> </ul>                                  |

Table S4. Documentation tracking of included literature.

| Data extraction/classification                                      | Focus                                                                                                                                                                                                                                                                                                                                                                                                                                                                                                       |
|---------------------------------------------------------------------|-------------------------------------------------------------------------------------------------------------------------------------------------------------------------------------------------------------------------------------------------------------------------------------------------------------------------------------------------------------------------------------------------------------------------------------------------------------------------------------------------------------|
| Title                                                               |                                                                                                                                                                                                                                                                                                                                                                                                                                                                                                             |
| Year                                                                |                                                                                                                                                                                                                                                                                                                                                                                                                                                                                                             |
| Authors                                                             |                                                                                                                                                                                                                                                                                                                                                                                                                                                                                                             |
| Institution (only first authors' first named institution)           |                                                                                                                                                                                                                                                                                                                                                                                                                                                                                                             |
| Document (article, conference contribution, review, report, others) | Article= peer-reviewed research article;<br>Conference contribution= abstract, presentation;<br>Review= secondary literature (review article);<br>Report= reports;<br>Others= thesis, brief, book chapter, website article, letter to the editor, press article, factsheet.                                                                                                                                                                                                                                 |
| Subgroup (Program, Tool, General, Strategy/ system/ legislation)    | Program= program, programme, project, initiative;<br>Tool= tool, material, diagnostics, technology (laboratory or computational), artificial intelligence, model;<br>General= topics without specific focus on a program, country/region, tool or case; related to technology, trade/border, disease, surveillance, pest, agriculture, behavior science, practices;<br>Strategy/System= strategies, systems, approaches, frameworks, governance, policy, legislations.                                      |
| Region                                                              | based if country/regional reference in the text appeared (no reference to authors affiliation); based on UN M49 geoscheme ( <a href="https://unstats.un.org/unsd/methodology/m49/">https://unstats.un.org/unsd/methodology/m49/</a> accessed on 12.06.2023) with certain modifications: Africa, Asia, Europe, Australia/ New Zealand (incl. Tokelau), Oceania (incl. Melanesia, Micronesia, Polynesia), Latin America (incl. Caribbean, Central and South America), Northern America, Global and no region. |

|                                                                                                                                         |                                                                                                                                                                                                                                                                                                                                                                                                                                                                                                                                                                                                                                                                                                                                                                                                                                                                                                                                                                                                                                                                                                                                                                                               |
|-----------------------------------------------------------------------------------------------------------------------------------------|-----------------------------------------------------------------------------------------------------------------------------------------------------------------------------------------------------------------------------------------------------------------------------------------------------------------------------------------------------------------------------------------------------------------------------------------------------------------------------------------------------------------------------------------------------------------------------------------------------------------------------------------------------------------------------------------------------------------------------------------------------------------------------------------------------------------------------------------------------------------------------------------------------------------------------------------------------------------------------------------------------------------------------------------------------------------------------------------------------------------------------------------------------------------------------------------------|
| Region specified (country, not for analyses)                                                                                            |                                                                                                                                                                                                                                                                                                                                                                                                                                                                                                                                                                                                                                                                                                                                                                                                                                                                                                                                                                                                                                                                                                                                                                                               |
| Domain (AMR/AMU, aquaculture, awareness& engagement, disease control, livestock, plant and environmental health, public health, others) | <p>AMR/AMU= antimicrobial resistance, antimicrobial usage;</p> <p>Aquaculture= aquaculture, fisheries, marine subjects;</p> <p>Awareness&amp; engagement= focus on engagement, awareness raising, community practices;</p> <p>Disease Control= focus on (specific or non-specific) animal diseases, its control or prevention measurements;</p> <p>Livestock= related to farm animal husbandry, bees farming, veterinary service related to livestock (livestock as defined by FAO [2]);</p> <p>Plant and environmental health= plant, environment, forestry, particular plant pests&amp; control;</p> <p>Public Health= focus on human public health services (incl. Covid19 pandemic);</p> <p>Trade/ border= Trade, trade regulations, border controls;</p> <p>Others= agriculture, food safety&amp; security, biosafety&amp; laboratory biosecurity, wildlife, biorisks, market/ trade/ border, regulatory mechanisms, policy/ legislation/ strategy/ direction, multilateral partnerships, tourism, technology/ model/ intelligence system, non-plant pests&amp; control (incl. invasive species, sentinel plants), social science/ behavior science, bioenergy, climate&amp; weather</p> |
| Animal groups (large ruminants, small ruminants, pigs, poultry, others)                                                                 | Others= horses, arthropods, wildlife animals                                                                                                                                                                                                                                                                                                                                                                                                                                                                                                                                                                                                                                                                                                                                                                                                                                                                                                                                                                                                                                                                                                                                                  |
| Disease information (not for analyses)                                                                                                  | Name of pathogen focus                                                                                                                                                                                                                                                                                                                                                                                                                                                                                                                                                                                                                                                                                                                                                                                                                                                                                                                                                                                                                                                                                                                                                                        |
| Disease focus (no disease focus, virus, bacteria, parasite)                                                                             |                                                                                                                                                                                                                                                                                                                                                                                                                                                                                                                                                                                                                                                                                                                                                                                                                                                                                                                                                                                                                                                                                                                                                                                               |
| Level of action (local, national, regional/global, more than one level, no level)                                                       | <p>Local= based on community/ district/ municipality/ state level;</p> <p>National= based on country-level</p> <p>Regional/global= based on regional of global focus</p>                                                                                                                                                                                                                                                                                                                                                                                                                                                                                                                                                                                                                                                                                                                                                                                                                                                                                                                                                                                                                      |
| Mode of action (practical, theoretical, both)                                                                                           | <p>Practical= practical testing of a tool or related to a particular activity/program/project/implementation/study/field application</p> <p>Theoretical= theoretical report, related to an approach or system description and not related to a specific program/project/implementation, may have a general reference, may be related to only recommendations/outlook</p> <p>Both= reference with practical and theoretical input (e.g. reviewing previous legislations under a particular strategy, case studies to evaluate practical approaches)</p>                                                                                                                                                                                                                                                                                                                                                                                                                                                                                                                                                                                                                                        |
| Initiative name (not for analyses)                                                                                                      |                                                                                                                                                                                                                                                                                                                                                                                                                                                                                                                                                                                                                                                                                                                                                                                                                                                                                                                                                                                                                                                                                                                                                                                               |
| Strenght1                                                                                                                               | Table S5                                                                                                                                                                                                                                                                                                                                                                                                                                                                                                                                                                                                                                                                                                                                                                                                                                                                                                                                                                                                                                                                                                                                                                                      |

|              |  |
|--------------|--|
| Strenght2    |  |
| Strenght3    |  |
| Opportunity1 |  |
| Opportunity2 |  |
| Opportunity3 |  |
| Weakness1    |  |
| Weakness2    |  |
| Weakness3    |  |
| Threat1      |  |
| Threat2      |  |
| Threat3      |  |

Table S5. Top 10 of each SWOT (strength, weakness, opportunity, threat) code used thought this review for the subgroups “Program”, “Strategy/System”, and “General”.

| SWOT            | Code                           | Keywords                                                                                                                                                         |
|-----------------|--------------------------------|------------------------------------------------------------------------------------------------------------------------------------------------------------------|
| <b>Strength</b> | Multistakeholder               | partnerships between governments and industry; enabling participants; collaborative; relevant stakeholders; stakeholder; collaboration; partners                 |
|                 | Participatory process          | co-created; participatory approach; buy-in; participation; participatory training                                                                                |
|                 | Capacity building              | build capacity; community science experts; training; capability and capacity; instructions; educational; capacity development; strengthening capacity; education |
|                 | Evidence based                 | science based; risk analysis; novel analytical tools; structured tool; Evidence                                                                                  |
|                 | Characteristics                | access; availability; dynamic; flexible; simple; comprehensive; specific; standardized                                                                           |
|                 | Time                           | timely; rapid; quickly; long-term; constant                                                                                                                      |
|                 | Knowledge& information sharing | information; knowledge; knowledge best practices                                                                                                                 |
|                 | Awareness& engagement          | engagement; awareness                                                                                                                                            |
|                 | Surveillance& reporting        | practices; detection; surveillance                                                                                                                               |
|                 | Guidelines& SOPs               | written biosecurity plan; standards; list to enhance practices; training material; protocols                                                                     |
| <b>Weakness</b> | Compliance                     | accountability; willingness; compliance; only few participants; low adoption                                                                                     |
|                 | Awareness& perceptions         | risk perceptions; values; awareness; perception                                                                                                                  |
|                 | Time                           | short-term; slow; sustainability                                                                                                                                 |
|                 | Capacity building              | training; capacity building; professional development                                                                                                            |
|                 | Financing& funding             | cost; funding; funds; economic                                                                                                                                   |
|                 | Knowledge& information sharing | data management; information; knowledge                                                                                                                          |
|                 | Coordination, management       | coordination; internal management; guidance                                                                                                                      |
|                 | Law& policy                    | legislation; policy; rights; law enforcement                                                                                                                     |
|                 | Regulatory mechanisms          | regulatory instruments; regulatory mechanisms                                                                                                                    |
|                 | Evidence based                 | evidence-based; scientific evidence                                                                                                                              |

|                    |                                    |                                                                                                                                                                 |
|--------------------|------------------------------------|-----------------------------------------------------------------------------------------------------------------------------------------------------------------|
|                    | Standardization/<br>Generalization | unspecific; variety; insufficient inclusion                                                                                                                     |
| <b>Opportunity</b> | Upscaling                          | multiplier; model; the first step; which can adopt; scaling; upscaling                                                                                          |
|                    | Law& policy enforcement            | policy; legislative; decision-making; ministries and agencies; governmental; government                                                                         |
|                    | Surveillance& reporting            | reporting system; surveillance; monitoring; detection                                                                                                           |
|                    | Multistakeholder                   | different stakeholders; state and non-state actors; stakeholders; collaboration; commitment and support of a number of key industry and government stakeholders |
|                    | Financing& funding                 | cost-effectiveness; economic incentives; sustainable funding; financial; cost; funding                                                                          |
|                    | Knowledge& information sharing     | knowledge; information; knowledge partnerships; dialogue                                                                                                        |
|                    | Time                               | sustainability; timeliness; quicker; long-term                                                                                                                  |
|                    | Technology                         | digital; technology; model; online                                                                                                                              |
|                    | Other trade-offs                   | reduced antimicrobial usage; animal welfare; food safety                                                                                                        |
| <b>Threat</b>      | Tourism, mobility                  | high human accessibility; tourism; travel; high mobility; movement*; transport                                                                                  |
|                    | Financing& funding                 | illegal; budget; resources; cost efficiency; financial                                                                                                          |
|                    | Demographic change                 | urbanization; growing population; demographic context; demographics; landholders                                                                                |
|                    | Government feedback                | government feedback; government commitment; the constraints of operating in their official capacities authorities                                               |
|                    | Trade                              | trading; undeclared; incursion                                                                                                                                  |
|                    | Disease outbreak                   | measels outbreak; outbreak                                                                                                                                      |
|                    | Time                               | long-term; not quickly                                                                                                                                          |
|                    | Compliance                         | is still not implementing sufficient; implementation of biosecurity measures                                                                                    |
|                    | Knowledge& information sharing     | knowledge; information                                                                                                                                          |
|                    | Coordination, management           | governance; operational roles& responsibilities                                                                                                                 |

Table S6. Examples of main questions in the biosecurity survey.

| Q#  | Part                                                                                                                                  | Question                                                                                            | Response type |
|-----|---------------------------------------------------------------------------------------------------------------------------------------|-----------------------------------------------------------------------------------------------------|---------------|
| #Q1 | Biosecurity initiatives/ programmes/ projects:                                                                                        | Biosecurity initiative/ programme/ project #1 – name                                                | free text     |
| #Q2 | Considering the broader biosecurity definition, please name biosecurity initiatives, programmes or projects you have experience with. | Biosecurity initiative/ programme/ project #1 - short description (objective, species, region, ...) | free text     |
| #Q3 |                                                                                                                                       | Biosecurity initiative/ programme/ project #2 – name                                                | free text     |
| #Q4 | Provide links/ resources if available. Feel free to refer to initiatives, programmes,                                                 | Biosecurity initiative/ programme/ project #2 - short description (objective, species, region, ...) | free text     |

|      |                                                                                                                                                                                                                                                                                                       |                                                                                                                               |                                                                          |
|------|-------------------------------------------------------------------------------------------------------------------------------------------------------------------------------------------------------------------------------------------------------------------------------------------------------|-------------------------------------------------------------------------------------------------------------------------------|--------------------------------------------------------------------------|
| #Q5  | projects on different levels (e.g. producer level, market level, consumer level, national level, global level, ...) in a wider biosecurity definition (e.g. considering relevance to disease control, surveillance, food safety, public health, wildlife, veterinary services, policy& governance...) | Are you aware of any other biosecurity initiatives/ programmes/ projects?                                                     | yes/no                                                                   |
| #Q6  |                                                                                                                                                                                                                                                                                                       | If yes, please indicate the names and give a short description of the biosecurity initiative/ programme/ project if possible. | free text                                                                |
| #Q7  | Biosecurity systems and approaches; Please consider the broader definition of biosecurity while answering following questions: In your view, ...                                                                                                                                                      | ...which are essential components of a good biosecurity system?                                                               | free text                                                                |
| #Q8  |                                                                                                                                                                                                                                                                                                       | ...what do you consider important for strengthening biosecurity on community/ producer level?                                 | free text                                                                |
| #Q9  |                                                                                                                                                                                                                                                                                                       | ...what are opportunities to integrate the private sector in strengthening biosecurity systems?                               | free text                                                                |
| #Q10 |                                                                                                                                                                                                                                                                                                       | Initiative/ programme/ project name:                                                                                          | free text                                                                |
| #Q11 | SWOT analysis of a successful biosecurity initiative/ programme/ project: Choose one initiative/ programme/ project that has been successful from your point of view and complete the SWOT analysis.                                                                                                  | Who is implementing the initiative/ programme/ project?                                                                       | free text                                                                |
| #Q12 |                                                                                                                                                                                                                                                                                                       | Who are the key stakeholders?                                                                                                 | free text                                                                |
| #Q13 |                                                                                                                                                                                                                                                                                                       | Implementation level:                                                                                                         | Choose: Local, National, Regional/Global                                 |
| #Q14 |                                                                                                                                                                                                                                                                                                       | Domain:                                                                                                                       | Choose: Large ruminants, small ruminants, pigs, poultry, other (specify) |
| #Q15 |                                                                                                                                                                                                                                                                                                       | Please highlight key successes or outcomes of the initiative/ programme/ project                                              | free text                                                                |
| #Q16 |                                                                                                                                                                                                                                                                                                       | Strengths (internal, positive)                                                                                                | free text                                                                |
| #Q17 | SWOT analysis (Strengths, Weaknesses, Opportunities, Threats); For a general understanding of a SWOT analysis, please see FAO Biosecurity Toolkit (2007), p.115 (in PDF p.127)                                                                                                                        | Weaknesses (internal, negative)                                                                                               | free text                                                                |
| #Q18 |                                                                                                                                                                                                                                                                                                       | Opportunities (external, positive)                                                                                            | free text                                                                |
| #Q19 |                                                                                                                                                                                                                                                                                                       | Threats (external, negative)                                                                                                  | free text                                                                |
| #Q20 |                                                                                                                                                                                                                                                                                                       | What were critical points for its successful implementation?                                                                  | free text                                                                |
| #Q21 |                                                                                                                                                                                                                                                                                                       | Initiative/ programme/ project name:                                                                                          | free text                                                                |
| #Q22 | SWOT analysis of a biosecurity initiative/ programme/ project that encountered challenges to meet it; Choose one initiative/ programme/ project that has not been successful from your point of view and complete the SWOT analysis.                                                                  | Who is implementing the initiative/ programme/ project?                                                                       | free text                                                                |
| #Q23 |                                                                                                                                                                                                                                                                                                       | Who are the key stakeholders?                                                                                                 | free text                                                                |
| #Q24 |                                                                                                                                                                                                                                                                                                       | Implementation level:                                                                                                         | Choose: Local, National, Regional/Global                                 |
| #Q25 |                                                                                                                                                                                                                                                                                                       | Domain:                                                                                                                       | Choose: Large ruminants, small ruminants, pigs,                          |



|      |                                                                                                                                                                                |                                                                                                                       |                          |
|------|--------------------------------------------------------------------------------------------------------------------------------------------------------------------------------|-----------------------------------------------------------------------------------------------------------------------|--------------------------|
|      |                                                                                                                                                                                |                                                                                                                       | poultry, other (specify) |
| #Q26 |                                                                                                                                                                                | Please highlight key successes or outcomes of the initiative/ programme/ project                                      | free text                |
| #Q27 | SWOT analysis (Strengths, Weaknesses, Opportunities, Threats); For a general understanding of a SWOT analysis, please see FAO Biosecurity Toolkit (2007), p.115 (in PDF p.127) | Strengths (internal, positive)                                                                                        | free text                |
| #Q28 |                                                                                                                                                                                | Weaknesses (internal, negative)                                                                                       | free text                |
| #Q29 |                                                                                                                                                                                | Opportunities (external, positive)                                                                                    | free text                |
| #Q30 |                                                                                                                                                                                | Threats (external, negative)                                                                                          | free text                |
| #Q31 |                                                                                                                                                                                | What were critical points for its successful implementation?                                                          | free text                |
| #Q32 | Others                                                                                                                                                                         | Please feel free to give us any other information resources and reference material that you deem useful for our work. | free text                |
| #Q33 |                                                                                                                                                                                | ...your name...                                                                                                       | free text                |
| #Q34 |                                                                                                                                                                                | ...your email address.                                                                                                | free text                |

## 2. References

1. Ouzzani, M.; Hammady, H.; Fedorowicz, Z.; Elmagarmid, A. Rayyan — a web and mobile app for systematic reviews (<https://www.rayyan.ai/>). *Systematic Reviews* **2016**, *5*.
2. FAO. Livestock statistics: Concepts, definitions and classifications. Available online: <https://www.fao.org/3/cb2461en/cb2461en.pdf> (accessed on 18 June 2023).

**Supplementary File S2 - List of All Included Records**

| #  | Title                                                                                                                                                                              | Year | Authors                                                                                                                                                                                                                                                                                         |
|----|------------------------------------------------------------------------------------------------------------------------------------------------------------------------------------|------|-------------------------------------------------------------------------------------------------------------------------------------------------------------------------------------------------------------------------------------------------------------------------------------------------|
| 1  | A Coordinated, Risk-Based, National Forest Biosecurity Surveillance Program for Australian Forests                                                                                 | 2022 | Carnegie, A. J.; Tovar, F.; Collins, S.; Lawson, S. A.; Nahrung, H. F.;                                                                                                                                                                                                                         |
| 2  | Securing participation in global pork production networks: biosecurity, multispecies entanglements, and the politics of domestication practices                                    | 2022 | Wang, C. M.                                                                                                                                                                                                                                                                                     |
| 3  | A bioavailable strontium ( $^{87}\text{Sr}/^{86}\text{Sr}$ ) isoscape for Aotearoa New Zealand: Implications for food forensics and biosecurity                                    | 2022 | Kramer, R. T. and Kinaston, R. L. and Holder, P. W. and Armstrong, K. F. and King, C. L. and Sipple, W. D. K. and Martin, A. P. and Pradel, G. and Turnbull, R. E. and Rogers, K. M. and Reid, M. and Barr, D. and Wijenayake, K. G. and Buckley, H. R. and Stirling, C. H. and Bataille, C. P. |
| 4  | Reconciling risk and responsibility on Indigenous country: bridging the boundaries to guide knowledge sharing for cross-cultural biosecurity risk management in northern Australia | 2022 | Kirsten Maclean, Cathy Robinson, Ellie Bock and Phil Rist                                                                                                                                                                                                                                       |
| 5  | Using a DNA barcoding approach to facilitate biosecurity: Identifying invasive alien macrophytes traded within the South African aquarium and pond plant industry                  | 2022 | Niemann, HJ; Bezeng, BS; Orton, RD; Kabongo, RM; Pilusa, M; van der Bank, M;                                                                                                                                                                                                                    |
| 6  | Africa Sustainable Livestock 2050. Co-creating solutions for biosecurity and broiler business. Co-creating solutions for biosecurity and broiler business                          | 2021 | FAO                                                                                                                                                                                                                                                                                             |
| 7  | Improving Biosecurity: A Science-Based Approach to Manage Fish Disease Risks and Increase the Socioeconomic Contribution of the Nigerian Catfish and Tilapia Industries            | 2021 | Khor, L; Delamare-Deboutteville, J; Chadag, V;                                                                                                                                                                                                                                                  |
| 8  | Changes in farmer animal health and biosecurity knowledge, attitudes and practices: Insights from Cambodia and Laos                                                                | 2021 | MacPhillamy, I.; Olmo, L.; Young, J.; Nampanya, S.; Suon, S.; Khounsy, S.; Windsor, P.; Toribio, J. A.; Bush, R.;                                                                                                                                                                               |
| 9  | Animal welfare and biosecurity assessment: a comparison between Italian and Irish beef cattle rearing systems                                                                      | 2021 | Fusi, F.; Lorenzi, V.; Franceschini, G.; Compiani, R.; Harper, V.; Ginestreti, J.; Ferrara, G.; Rossi, C. A. S.; Bertocchi, L.;                                                                                                                                                                 |
| 10 | Interpretable machine learning applied to on-farm biosecurity and porcine reproductive and respiratory syndrome virus                                                              | 2021 | Sykes, A. L.; Silva, G. S.; Holtkamp, D. J.; Mauch, B. W.; Osemeke, O.; Linhares, D. C. L.; Machado, G.;                                                                                                                                                                                        |
| 11 | On-site hygiene and biosecurity assessment: A new tool to assess live bird stalls in wet markets                                                                                   | 2021 | Soon, J. M.; Wahab, I. R. A.;                                                                                                                                                                                                                                                                   |
| 12 | 4-H youth advance biosecurity at home and in their communities                                                                                                                     | 2021 | Smith, M. H.; Smith, W. A.; Meehan, C. L.;                                                                                                                                                                                                                                                      |

|    |                                                                                                                                                                                    |      |                                                                                                                                                                                              |
|----|------------------------------------------------------------------------------------------------------------------------------------------------------------------------------------|------|----------------------------------------------------------------------------------------------------------------------------------------------------------------------------------------------|
| 13 | Field application of biosecurity measures at small scale farmer level                                                                                                              | 2021 | Lee, Hu Suk;                                                                                                                                                                                 |
| 14 | Advancing One Biosecurity to Address the Pandemic Risks of Biological Invasions                                                                                                    | 2021 | Hulme, P. E.;                                                                                                                                                                                |
| 15 | Mamalu Poepoe: Enhancing Hawaii's Biosecurity Through Interagency Collaboration                                                                                                    | 2021 | Kaufman, L. V.                                                                                                                                                                               |
| 16 | The Boundary of the Market for Biosecurity Risk                                                                                                                                    | 2021 | Stoneham, G.; Hester, S. M.; Li, J. S. H.; Zhou, R.; Chaudhry, A.;                                                                                                                           |
| 17 | The Tasmanian biosecurity system-a strategically planned approach to delivering biosecurity outcomes                                                                               | 2021 | Bishop, AC;                                                                                                                                                                                  |
| 18 | Assembling the team of 5 million: Socio-technical relations in Aotearoa-New Zealand's biosecurity system                                                                           | 2021 | Edwards, Sarah                                                                                                                                                                               |
| 19 | Tourism biosecurity risk management and planning: an international comparative analysis and implications for Ireland                                                               | 2021 | Melly, D.; Hanrahan, J.;                                                                                                                                                                     |
| 20 | ddRAD sequencing: an emerging technology added to the biosecurity toolbox for tracing the origin of brown marmorated stink bug, <i>Halyomorpha halys</i> (Hemiptera: Pentatomidae) | 2021 | Yan, J. and Vitek, G. and Pal, C. and Zhang, J. and Gmati, R. and Fan, Q. H. and Gunawardana, D. N. and Burne, A. and Anderson, D. and Balan, R. K. and George, S. and Farkas, P. and Li, D. |
| 21 | An Integrated Biosecurity Risk Assessment Model (IBRAM) For Evaluating the Risk of Import Pathways for the Establishment of Invasive Species                                       | 2021 | Jamieson, L. E. and Woodberry, O. and Mascaro, S. and Meurisse, N. and Jaksons, R. and Brown, S. D. J. and Ormsby, M.                                                                        |
| 22 | Are the EU biosecurity legislative frameworks sufficiently effective to prevent biological invasions in the Natura 2000 network?- A case study in Mediterranean Europe             | 2021 | Baquero, R. A.; Ayllon, D.; Nicola, G. G.;                                                                                                                                                   |
| 23 | Elevating and Recognising Knowledge of Indigenous Peoples to Improve Forest Biosecurity                                                                                            | 2021 | Kuru, R.; Marsh, A.; Ganley, B.;                                                                                                                                                             |
| 24 | Forest Biosecurity in Canada - An Integrated Multi-Agency Approach                                                                                                                 | 2021 | Allison, J. D.; Marcotte, M.; Noseworthy, M.; Ramsfield, T.;                                                                                                                                 |
| 25 | Policing biosecurity: police enforcement of special measures in New South Wales and Victoria during the COVID-19 pandemic                                                          | 2021 | Boon-Kuo, L. and Brodie, A. and Keene-McCann, J. and Sentas, V. and Weber, L.                                                                                                                |
| 26 | Enacting and resisting biosecurity citizenship: More-than-human geographies of enrolment in a disease eradication scheme in Scotland                                               | 2021 | Shortall, O.; Brown, K.;                                                                                                                                                                     |
| 27 | U.S. Cattle Producer Adoption of Secure Beef Supply Plan Enhanced Biosecurity Practices and Foot-and-Mouth Disease Preparedness                                                    | 2021 | Pudenz, C. C.; Mitchell, J. L.; Schulz, L. L.; Tonsor, G. T.;                                                                                                                                |
| 28 | China's evolving biosafety/biosecurity legislations                                                                                                                                | 2021 | Cao, C.;                                                                                                                                                                                     |
| 29 | Forest biosecurity laws in South-East Asia: a review                                                                                                                               | 2021 | Healey, M. A. and Lawson, S. A. and Somany, S. and Tasen, W. and Ngoc, Q. D.                                                                                                                 |

|    |                                                                                                                                                                                                     |      |                                                                                                                                                                                                                                                                                                                                                    |
|----|-----------------------------------------------------------------------------------------------------------------------------------------------------------------------------------------------------|------|----------------------------------------------------------------------------------------------------------------------------------------------------------------------------------------------------------------------------------------------------------------------------------------------------------------------------------------------------|
| 30 | Plant-parasitic nematodes on turfgrass in Queensland, Australia, and biosecurity issues associated with the interstate transfer and eradication of southern sting nematode ( <i>Ibipora lolii</i> ) | 2021 | Stirling, G. R.; Stirling, A. M.; Eden, L.;                                                                                                                                                                                                                                                                                                        |
| 31 | Deep Learning and Phenology Enhance Large-Scale Tree Species Classification in Aerial Imagery during a Biosecurity Response                                                                         | 2021 | Pearse, G. D.; Watt, M. S.; Soewarto, J.; Tan, A. Y. S.;                                                                                                                                                                                                                                                                                           |
| 32 | Biosecurity at Cattle Farms: Strengths, Weaknesses, Opportunities and Threats                                                                                                                       | 2021 | Renault, V.; Humblet, M. F.; Pham, P. N.; Saegerman, C.;                                                                                                                                                                                                                                                                                           |
| 33 | Strengthening Biosecurity Preparedness through Enhanced Rapid Detection of African Swine Fever in Papua New Guinea - TCP/PNG/3706                                                                   | 2021 | FAO                                                                                                                                                                                                                                                                                                                                                |
| 34 | Opportunities for Transdisciplinary Science to Mitigate Biosecurity Risks From the Intersectionality of Illegal Wildlife Trade With Emerging Zoonotic Pathogens                                     | 2021 | Aguirre, A. A.; Gore, M. L.; Kammer-Kerwick, M.; Curtin, K. M.; Heyns, A.; Preiser, W.; Shelley, L. I.;                                                                                                                                                                                                                                            |
| 35 | Using Co-Design to Create Community Advocacy for Biosecurity Behavior Change                                                                                                                        | 2021 | Sherring, P.                                                                                                                                                                                                                                                                                                                                       |
| 36 | Assessment of the Biosafety and Biosecurity Landscape in the Philippines and the Development of the National Biorisk Management Framework                                                           | 2021 | Destura, R. V.; Lam, H. Y.; Navarro, R. C.; Lopez, J. C. F.; Sales, R. K. P.; Gomez, Mifa; dela Tonga, A.; Ulanday, G. E.;                                                                                                                                                                                                                         |
| 37 | Forest Biosecurity Systems and Processes: An Indian Perspective                                                                                                                                     | 2021 | Gupta, K.; Sankaran, K. V.;                                                                                                                                                                                                                                                                                                                        |
| 38 | Biosecurity practices and border control to stop the spread of African swine fever                                                                                                                  | 2020 | FAO                                                                                                                                                                                                                                                                                                                                                |
| 39 | Antimicrobial usage, animal welfare and biosecurity in 16 dairy farms in Lombardy                                                                                                                   | 2020 | Ginestreti, J. and Lorenzi, V. and Fusi, F. and Ferrara, G. and Scali, F. and Alborali, G. L. and Bolzoni, L. and Bertocchi, L.                                                                                                                                                                                                                    |
| 40 | Using Biosecurity Measures to Combat Respiratory Disease in Cattle: The Norwegian Control Program for Bovine Respiratory Syncytial Virus and Bovine Coronavirus                                     | 2020 | Stokstad, M.; Klem, T. B.; Myrmel, M.; Oma, V. S.; Toftaker, I.; Østerås, O.; Nødtvedt, A.;                                                                                                                                                                                                                                                        |
| 41 | A risk-based scoring system to quantify biosecurity in cattle production                                                                                                                            | 2020 | Damiaans, B.; Renault, V.; Sarrazin, S.; Berge, A. C.; Pardon, B.; Saegerman, C.; Dewulf, J.;                                                                                                                                                                                                                                                      |
| 42 | Biosecurity measures in European beekeeping                                                                                                                                                         | 2020 | Pietropaoli, M. and Ribarits, A. and Moosbeckhofer, R. and Koglberger, H. and Alber, O. and Gregorc, A. and Skerl, M. I. S. and Presern, J. and Bubnic, J. and Muz, M. N. and Higes, M. and Tiozzo, B. and Jannoni-Sebastianini, F. and Lubroth, J. and Cazier, J. and Raizman, E. and Zilli, R. and Bagni, M. and Della Marta, U. and Formato, G. |
| 43 | Herd typologies based on multivariate analysis of biosecurity, productivity,                                                                                                                        | 2020 | Kruse, A. B. and Nielsen, L. R. and Alban, L.                                                                                                                                                                                                                                                                                                      |

|    |                                                                                                                                                                          |      |                                                                                                                                                                                             |
|----|--------------------------------------------------------------------------------------------------------------------------------------------------------------------------|------|---------------------------------------------------------------------------------------------------------------------------------------------------------------------------------------------|
|    | antimicrobial and vaccine use data from Danish sow herds                                                                                                                 |      |                                                                                                                                                                                             |
| 44 | Development of a biosecurity assessment tool and the assessment of biosecurity levels by this tool on Japanese commercial swine farms                                    | 2020 | Sasaki, Y. and Furutani, A. and Furuichi, T. and Hayakawa, Y. and Ishizeki, S. and Kano, R. and Koike, F. and Miyashita, M. and Mizukami, Y. and Watanabe, Y. and Otake, S. and P, J. E. T. |
| 45 | Participatory training and mobile phone assisted approaches for strengthening capacity of Uganda smallholder pigs value chains actors in biosecurity and disease control | 2020 | Dione, Michel M and Kangethe, Edwin and Dror, Iddo and Ndiwa, Nicholas N and Poole, Elizabeth J and Wieland, Barbara                                                                        |
| 46 | Biosecurity levels of pig fattening farms from four EU countries and links with the farm characteristics                                                                 | 2020 | Chantziaras, I. and Dewulf, J. and Van Limbergen, T. and Stadejek, T. and Niemi, J. and Kyriazakis, I. and Maes, D.                                                                         |
| 47 | Impact of participatory training of smallholder pig farmers on knowledge, attitudes and practices regarding biosecurity for the control of African swine fever in Uganda | 2020 | Dione, M. M. and Dohoo, I. and Ndiwa, N. and Poole, J. and Ouma, E. and Amia, W. C. and Wieland, B.                                                                                         |
| 48 | A self-assessment tool to improve poultry farm biosecurity regarding avian influenza                                                                                     | 2020 | Grabkowsky, B. and Conraths, F. J. and Globig, A. and Wilke, A. and Denzin, N.                                                                                                              |
| 49 | Detect-alert-deter system for enhanced biosecurity and risk assessment                                                                                                   | 2020 | Atzeni, Michael and Muehlebach, John and Fielder, Darren and Mayer, David G                                                                                                                 |
| 50 | Biosecurity assessment of layer farms in Central Luzon, Philippines                                                                                                      | 2020 | Tanquilut, N. C.; Espaldon, M. V. O.; Eslava, D. F.; Ancog, R. C.; Medina, C. D. R.; Paraso, M. G. V.; Domingo, R. D.;                                                                      |
| 51 | Quantitative assessment of biosecurity in broiler farms using Biocheck.UGent in Central Luzon, Philippines                                                               | 2020 | Tanquilut, N. C. and Espaldon, M. V. O. and Eslava, D. F. and Ancog, R. C. and Medina, C. D. R. and Paraso, M. G. V. and Domingo, R. D. and Dewulf, J.                                      |
| 52 | A united front against marine invaders: Developing a cost-effective marine biosecurity surveillance partnership between government and industry                          | 2020 | McDonald, J. I. and Wellington, C. M. and Coupland, G. T. and Pedersen, D. and Kitchen, B. and Bridgwood, S. D. and Hewitt, M. and Duggan, R. and Abdo, D. A.                               |
| 53 | Draft national strategy on aquatic animal health and biosecurity for the Federated States of Micronesia (2021- 2024)                                                     | 2020 | FAO, FSM, SPC                                                                                                                                                                               |
| 54 | National Aquatic Animal Health and Biosecurity Strategy – FAO project TCP/MIC/3603/C2 for the federated states of micronesia                                             | 2020 | MacKinnon, B. et al                                                                                                                                                                         |
| 55 | Regulating Vessel Biofouling to Support New Zealand's Marine Biosecurity System - A Blue Print for Evidence-Based Decision Making                                        | 2020 | Georgiades, E. and Kluza, D. and Bates, T. and Lubarsky, K. and Brunton, J. and Growcott, A. and Smith, T. and McDonald, S. and Gould, B. and Parker, N. and Bell, A.                       |
| 56 | How indigenous researchers are shaking up New Zealand's biosecurity system via the                                                                                       | 2020 | Shadbolt, Melanie; Waipara, N; Black, Amanda;                                                                                                                                               |

|    |                                                                                                                                                              |      |                                                                                                                                                        |
|----|--------------------------------------------------------------------------------------------------------------------------------------------------------------|------|--------------------------------------------------------------------------------------------------------------------------------------------------------|
|    | establishment of a Māori Biosecurity Network                                                                                                                 |      |                                                                                                                                                        |
| 57 | Recreational angling as a pathway for invasive non-native species spread: awareness of biosecurity and the risk of long distance movement into Great Britain | 2020 | Smith, E. R. C.; Bennion, H.; Sayer, C. D.; Aldridge, D. C.; Owen, M.;                                                                                 |
| 58 | Understanding general surveillance for biosecurity as a system                                                                                               | 2020 | Kruger, Heleen; El Hassan, Marwan; Stenekes, Nyree; Kancans, Robert;                                                                                   |
| 59 | The Epidemiological Framework for Biological Invasions (EFBI): an interdisciplinary foundation for the assessment of biosecurity threats                     | 2020 | Hulme, P. E. and Baker, R. and Freckleton, R. and Hails, R. S. and Hartley, M. and Harwood, J. and Marion, G. and Smith, G. C. and Williamson, M.      |
| 60 | Program Chair Poster Pick: Healthy Farms Healthy Agriculture: A Web Hub for Biosecurity to Protect the Herd and Flock                                        | 2020 | Smith, J. M. and Cummings, J. C.                                                                                                                       |
| 61 | Aquaculture biosecurity: Practical approach to prevent, control, and eradicate diseases                                                                      | 2020 | Scarfe, A David and PaliÅž, DuÅžjan                                                                                                                    |
| 62 | A decade of RCPAQAP Biosecurity improving testing for biological threats in Australia                                                                        | 2020 | Lau, K. A. and Theis, T. and Kaufer, A. M. and Gray, J. L. and Rawlinson, W. D.                                                                        |
| 63 | Evaluating the health of Australia's biosecurity system                                                                                                      | 2020 | Schneider, Karen; Arndt, Edith; Baumgartner, John; Camac, James; Dodd, Aaron; Fraser, Hannah; Gomboso, Jay; Gibert, Anaïs; Kompas, Tom; Lane, Stephen; |
| 64 | Biosecurity situation assessment for livestock, plant and food areas in Bhutan. Online meeting report                                                        | 2020 | FAO                                                                                                                                                    |
| 65 | Our Australian biosecurity system needs a rethink for decade's challenges                                                                                    | 2020 | Still, C.                                                                                                                                              |
| 66 | A Risk Analysis Framework for Prioritizing and Managing Biosecurity Threats                                                                                  | 2020 | Montibeller, G. and Franco, L. A. and Carreras, A.                                                                                                     |
| 67 | Use of meteorological data in biosecurity                                                                                                                    | 2020 | Hemming, D. and Macneill, K.                                                                                                                           |
| 68 | Faba Bean Gall ( <i>Olpidium viciae</i> K.) as a Priority Biosecurity Threat for Producing Faba Bean in Ethiopia: Current Status and Future Perspectives     | 2020 | Meresa, B. K.; Gebremedhin, H. M.;                                                                                                                     |
| 69 | Supporting Urban Weed Biosecurity Programs with Remote Sensing                                                                                               | 2020 | Sheffield, K. and Dugdale, T.                                                                                                                          |
| 70 | Implementation of the GB Plant Health and Biosecurity Strategy 2014-2019 with foresight on a new strategy for 2020                                           | 2020 | Spence, N.                                                                                                                                             |
| 71 | The emergence of prioritisation systems to inform plant health biosecurity policy decisions                                                                  | 2020 | MacLeod, A. and Lloyd, S.                                                                                                                              |
| 72 | Blurred lines: integrating emerging technologies to advance plant biosecurity                                                                                | 2020 | Hu, Y. H. and Wilson, S. and Schwessinger, B. and Rathjen, J. P.                                                                                       |
| 73 | Missed Opportunities? Covid-19, Biosecurity and One Health in the United Kingdom                                                                             | 2020 | Enticott, G. and Maye, D.                                                                                                                              |

|    |                                                                                                                                                                                                    |      |                                                                                                                                                                                                                                                                                                                                                                              |
|----|----------------------------------------------------------------------------------------------------------------------------------------------------------------------------------------------------|------|------------------------------------------------------------------------------------------------------------------------------------------------------------------------------------------------------------------------------------------------------------------------------------------------------------------------------------------------------------------------------|
| 74 | Biosecurity in multifunctional landscapes: challenges for approaches based on the concept of 'shared responsibility'                                                                               | 2020 | Sinclair, K.; Curtis, A.; Freeman, P.;                                                                                                                                                                                                                                                                                                                                       |
| 75 | Analysis of biosecurity-related policies governing the seaweed industry of the Philippines                                                                                                         | 2020 | Mateo, J. P. and Campbell, I. and Cottier-Cook, E. J. and Luhan, M. R. J. and Ferriols, Vmen and Hurtado, A. Q.                                                                                                                                                                                                                                                              |
| 76 | Getting on board with biosecurity: Evaluating the effectiveness of marine invasive alien species biosecurity policy for England and Wales                                                          | 2020 | Shannon, C. and Stebbing, P. D. and Dunn, A. M. and Quinn, C. H.                                                                                                                                                                                                                                                                                                             |
| 77 | Strengthening Capacity in Home Gardening, Healthy Food Awareness and Effective Biosecurity for Tokelau - TCP/TOK/3601                                                                              | 2020 | FAO                                                                                                                                                                                                                                                                                                                                                                          |
| 78 | Reasons for and barriers to biosafety and biosecurity training in health-related organizations in Africa, Middle East and Central Asia: findings from GIBACHT training needs assessments 2018-2019 | 2020 | Rutebemberwa, E. and Aku, F. Y. and Al Zein, E. I. K. and Bellali, H.                                                                                                                                                                                                                                                                                                        |
| 79 | An analysis of the current status and future of biosecurity frameworks for the Indonesian seaweed industry                                                                                         | 2020 | Kambey, C. S. B.; Campbell, I.; Sondak, C. F. A.; Nor, A. R. M.; Lim, P. E.; Cottier-Cook, E. J.;                                                                                                                                                                                                                                                                            |
| 80 | Public private collaborations amidst an emergency plant disease outbreak: The Australian experience with biosecurity for Panama disease                                                            | 2020 | de la Cruz, J.                                                                                                                                                                                                                                                                                                                                                               |
| 81 | Emergency preparedness and contingency plans to aquatic animal disease emergencies                                                                                                                 | 2019 | Bondad-Reantaso, Melba G                                                                                                                                                                                                                                                                                                                                                     |
| 82 | Southeast Asia Strategic Multilateral Dialogue on Biosecurity                                                                                                                                      | 2019 | Cicero, A. and Meyer, D. and Shearer, M. P. and AbuBakar, S. and Bernard, K. and Carus, W. S. and Chong, C. K. and Fischer, J. and Hynes, N. and Inglesby, T. and Kwa, C. G. and Makalinao, I. and Pangestu, T. and Sitompul, R. and Soebandrio, A. and Sudarmono, P. and Tjen, D. and Wibulpolprasert, S. and Yunus, Z.                                                     |
| 83 | Accelerating Action in Global Health Security: Global Biosecurity Dialogue as a Model for Advancing the Global Health Security Agenda                                                              | 2019 | Brizee, S. and Budeski, K. and James, W. and Nalabandian, M. and Bleijs, D. A. and Becker, S. J. and Wallace-Sankarsingh, S. and Ahumibe, A. and Agogo, E. and Ihekweazu, C. and Nikkari, S. and Ellis, M. and Gozzer, E. and Semesi, I. S. and Masuku, Z. M. and Ikram, A. and Tahir, F. and Makalinao, I. and Severance, H. A. and van Passel, M. W. J. and Cameron, E. E. |
| 84 | Using the Biocheck.UGent (TM) scoring tool in Irish farrow-to-finish pig farms: assessing biosecurity and its relation to productive performance                                                   | 2019 | da Costa, M. R. and Gasa, J. and Diaz, J. A. C. and Postma, M. and Dewulf, J. and McCutcheon, G. and Manzanilla, E. G.                                                                                                                                                                                                                                                       |

|    |                                                                                                                                                                                                                       |      |                                                                                                                                                                                                                |
|----|-----------------------------------------------------------------------------------------------------------------------------------------------------------------------------------------------------------------------|------|----------------------------------------------------------------------------------------------------------------------------------------------------------------------------------------------------------------|
| 85 | Additive Bayesian Network analysis of associations between antimicrobial it consumption, biosecurity, vaccination and productivity in Danish sow herds                                                                | 2019 | Lopes, R. and Kruse, A. B. and Nielsen, L. R. and Nunes, T. P. and Alban, L.                                                                                                                                   |
| 86 | Unmanned Aerial Vehicles and Biosecurity: Enabling Participatory-Design to Help Address Social Licence to Operate Issues                                                                                              | 2019 | Ogilvie, S. and McCarthy, A. and Allen, W. and Grant, A. and Mark-Shadbolt, M. and Pawson, S. and Richardson, B. and Strand, T. and Langer, E. R. and Marzano, M.                                              |
| 87 | Adoption of Secure Pork Supply Plan Biosecurity by U.S. Swine Producers                                                                                                                                               | 2019 | Pudenz, C. C. and Schulz, L. L. and Tonsor, G. T.                                                                                                                                                              |
| 88 | Assessment of Biosecurity Level in Pig and Poultry Production System in Vietnam Using Bio-check Technology Assessment of Biosecurity Level in Pig and Poultry Production System in Vietnam Using Bio-check Technology | 2019 | Cuc, Ngo Thi Kim; Tuan, Ha Minh; Dewulf, Jeroen; Postma, Merel; Dinh, Nguyen Cong;                                                                                                                             |
| 89 | Assessment of biosecurity practices and development of a scoring system in swine farms using item response theory                                                                                                     | 2019 | Silva, G. S. and Leotti, V. B. and Castro, S. M. J. and Medeiros, A. A. R. and Silva, Apsp and Linhares, D. C. L. and Corbellini, L. G.                                                                        |
| 90 | Biosecurity system reforms and the development of a risk-based surveillance and pathway analysis system for ornamental fish imported into Australia                                                                   | 2019 | Hood, Y. and Sadler, J. and Poldy, J. and Starkey, C. S. and Robinson, A. P.                                                                                                                                   |
| 91 | Building a sustainable aquaculture industry in South Africa: the role of biosecurity                                                                                                                                  | 2019 | Christison, K. W.                                                                                                                                                                                              |
| 92 | Research on Current Situation and Path of Aquatic Biosecurity System Construction in Shandong Province                                                                                                                | 2019 | Xu, Tao and Chen, Dongqing                                                                                                                                                                                     |
| 93 | Using behaviour science to maintain resilience of Queensland's biosecurity system                                                                                                                                     | 2019 | Keir, Stephanie                                                                                                                                                                                                |
| 94 | Biosafety and Biosecurity Challenges Facing Veterinary Diagnostic Laboratories in Lower-Middle Income Countries in Southeast Asia: A Case Study of Thailand                                                           | 2019 | Siengsan-Lamont, J. and Kamolsiripichaiporn, S. and Ruanchaimun, S. and Patchimasiri, T. and Jongrakwattana, B. and Blacksell, S. D.                                                                           |
| 95 | Connecting island communities on a global scale: case studies in island biosecurity                                                                                                                                   | 2019 | Matos, J. and Little, A. and Broome, K. and Kennedy, E. and Sanchez, F. A. M. and Latofski-Robles, M. and Irvine, R. and Gill, C. and Espinoza, A. and Howald, G. and Olthof, K. and Ball, M. and Boser, C. L. |
| 96 | Managing the grand challenge of biological threats to food production: The importance of institutional logics for managing Australian biosecurity                                                                     | 2019 | Bryant, M. and Higgins, V.                                                                                                                                                                                     |
| 97 | Reforming Biosecurity Legislation in Developing Countries: Increasing Market                                                                                                                                          | 2019 | Black, R.                                                                                                                                                                                                      |



|     |                                                                                                                                                                    |      |                                                                                                                                                    |
|-----|--------------------------------------------------------------------------------------------------------------------------------------------------------------------|------|----------------------------------------------------------------------------------------------------------------------------------------------------|
|     | Access or Maintaining Unequal Terms of Trade?                                                                                                                      |      |                                                                                                                                                    |
| 98  | A Collaboratory for the Distributed Collaborations Within a Biosecurity Laboratory and Across Different Organizations                                              | 2019 | Li, J. and Zic, J.                                                                                                                                 |
| 99  | The value of sentinel plants for risk assessment and surveillance to support biosecurity                                                                           | 2019 | Mansfield, S. and McNeill, M. R. and Aalders, L. T. and Bell, N. L. and Kean, J. M. and Barratt, B. I. P. and Boyd-Wilson, K. and Teulon, D. A. J. |
| 100 | Improved biosecurity surveillance of non-native forest insects: a review of current methods                                                                        | 2019 | Poland, T. M. and Rassati, D.                                                                                                                      |
| 101 | Optimal allocation of limited resources to biosecurity surveillance using a portfolio theory methodology                                                           | 2019 | Barnes, B. and Giannini, F. and Arthur, A. and Walker, J.                                                                                          |
| 102 | Enhancing plant biosecurity with citizen science monitoring: comparing methodologies using reports of acute oak decline                                            | 2019 | Baker, E. and Jeger, M. J. and Mumford, J. D. and Brown, N.                                                                                        |
| 103 | Post-Border Forest Biosecurity in Australia: Response to Recent Exotic Detections, Current Surveillance and Ongoing Needs                                          | 2019 | Carnegie, A. J. and Nahrung, H. F.                                                                                                                 |
| 104 | The post-politics of plant biosecurity: The British Government's response to ash dieback in 2012                                                                   | 2019 | Tsouvalis, J.                                                                                                                                      |
| 105 | Biosecurity institutions and the choice of contracts in international fruit supply chains                                                                          | 2019 | Pavez, I. and Codron, J. M. and Lubello, P. and Florencio, M. C.                                                                                   |
| 106 | Emerging Stakeholder Relations in Participatory ICT Design: Renegotiating the Boundaries of Sociotechnical Innovation in Forest Biosecurity Surveillance           | 2019 | Grant, A. and Pawson, S. M. and Marzano, M.                                                                                                        |
| 107 | Participatory Impact Assessment following training of smallholder pig farmers on biosecurity for the control of African swine fever in Uganda                      | 2018 | Dione, Michel M                                                                                                                                    |
| 108 | "Smart regulation" and community cooperation in Australia's modern biosecurity context                                                                             | 2018 | Kruger, H.                                                                                                                                         |
| 109 | Creating a framework for the prioritization of biosecurity risks to the New Zealand dairy industry                                                                 | 2018 | Muellner, P. and Hodges, D. and Ahlstrom, C. and Newman, M. and Davidson, R. and Pfeiffer, D. and Marshall, J. and Morley, C.                      |
| 110 | Surveillance Data Highlights Feed Form, Biosecurity, and Disease Control as Significant Factors Associated with Salmonella Infection on Farrow-to-Finish Pig Farms | 2018 | Argüello, H. and Manzanilla, E. G. and Lynch, H. and Walia, K. and Leonard, F. C. and Egan, J. and Duffy, G. and Gardiner, G. E. and Lawlor, P. G. |
| 111 | Development of a risk assessment tool for improving biosecurity on pig farms                                                                                       | 2018 | Allepuz, A. and Mart  n-Valls, G. E. and Casal, J. and Mateu, E.                                                                                   |

|     |                                                                                                                                                                                           |      |                                                                                                                                                                                                       |
|-----|-------------------------------------------------------------------------------------------------------------------------------------------------------------------------------------------|------|-------------------------------------------------------------------------------------------------------------------------------------------------------------------------------------------------------|
| 112 | Contract bonus systems to encourage biosecurity adoption on small-scale broiler farms in Indonesia                                                                                        | 2018 | Komaladara, Aasp and Patrick, I. and Hoang, N.                                                                                                                                                        |
| 113 | Review of transmission routes of 24 infectious diseases preventable by biosecurity measures and comparison of the implementation of these measures in pig herds in six European countries | 2018 | Filippitzi, M. E. and Kruse, A. B. and Postma, M. and Sarrazin, S. and Maes, D. and Alban, L. and Nielsen, L. R. and Dewulf, J.                                                                       |
| 114 | B-eSecure: electronic system to measure and improve biosecurity on pig farms                                                                                                              | 2018 | Geurts, V and D'Áz, I and Collet-Surinach, M                                                                                                                                                          |
| 115 | Linking supply chain governance and biosecurity in the context of HPAI control in Western Java: a value chain perspective                                                                 | 2018 | Indrawan, Dikky and Rich, Karl M and Van Horne, Peter and Daryanto, Arief and Hogeveen, Henk                                                                                                          |
| 116 | Scoring biosecurity in European conventional broiler production                                                                                                                           | 2018 | Van Limbergen, T. and Dewulf, J. and Klinkenberg, M. and Ducatelle, R. and Gelaude, P. and Mendez, J. and Heinola, K. and Papasolomontos, S. and Szeleszczuk, P. and Maes, D. and Consortium, Prohlth |
| 117 | Strengthening biosecurity capacity of Palau<br>FAO project tcp/pl/3601/c1                                                                                                                 | 2018 | Arthur, JR and Miles, J and Remengesau, I and Aguilar, Glenn and Ambatang, R and Sengebau, F and Isamu, T and Bondad-Reantaso, M and FAO                                                              |
| 118 | Development of a Regional Aquatic Biosecurity Strategy for the Southern African Development Community (SADC)                                                                              | 2018 | FAO                                                                                                                                                                                                   |
| 119 | Knowledge to action on aquatic invasive species: Island biosecurity - the New Zealand and South Pacific story                                                                             | 2018 | Champion, P. D.                                                                                                                                                                                       |
| 120 | Extreme deep learning in biosecurity: the case of machine hearing for marine species identification                                                                                       | 2018 | Demertzis, K. and Iliadis, L. S. and Anezakis, V. D.                                                                                                                                                  |
| 121 | Sounding out pests: the potential of hydroacoustics as a surveillance and compliance tool in aquatic biosecurity                                                                          | 2018 | Abdo, D. A. and Duggan, R. L. and McDonald, J. I.                                                                                                                                                     |
| 122 | Synthetic antibody: Prospects in aquaculture biosecurity                                                                                                                                  | 2018 | Chong, C. M. and Low, C. F.                                                                                                                                                                           |
| 123 | Key actors in driving behavioural change in relation to on-farm biosecurity; a Northern Ireland perspective                                                                               | 2018 | Lahuerta-Marin, A. and Brennan, M. L. and Finney, G. and O'Hagan, M. J. H. and Jack, C.                                                                                                               |
| 124 | Analysis of Australia's New Biosecurity Legislation                                                                                                                                       | 2018 | Durant, S. and Faunce, T.                                                                                                                                                                             |
| 125 | A Systems Approach to Agricultural Biosecurity                                                                                                                                            | 2018 | Anand, M.                                                                                                                                                                                             |
| 126 | SurF: an innovative framework in biosecurity and animal health surveillance evaluation                                                                                                    | 2018 | Muellner, P. and Watts, J. and Bingham, P. and Bullians, M. and Gould, B. and Pande, A. and Riding, T. and Stevens, P. and Vink, D. and Staerk, K. D. C.                                              |

|     |                                                                                                                                                                 |      |                                                                                                                                                                                                      |
|-----|-----------------------------------------------------------------------------------------------------------------------------------------------------------------|------|------------------------------------------------------------------------------------------------------------------------------------------------------------------------------------------------------|
| 127 | CEBRA Project 1606E: Scoping the value and performance of interventions across the NZ Biosecurity system                                                        | 2018 | Robinson, Andrew; Brockerhoff, Eckehard; Ormsby, Michael;                                                                                                                                            |
| 128 | A qualitative binary risk assessment model for regulating the biosecurity and environmental risk of endophytes                                                  | 2018 | Bromfield, K. E. and Corin, S. and Atapattu, A.                                                                                                                                                      |
| 129 | A Tool for Assessment of Animal Health Laboratory Safety and Biosecurity: The Safety Module of the Food and Agriculture Organization's Laboratory Mapping Tool  | 2018 | Mouillé, B. and Dauphin, G. and Wiersma, L. and Blacksell, S. D. and Claes, F. and Kalpravidh, W. and Kabore, Y. and Hietala, S.                                                                     |
| 130 | Benchmarking forest health surveillance and biosecurity activities for managing Australia's exotic forest pest and pathogen risks                               | 2018 | Carnegie, A. J. and Lawson, S. and Wardlaw, T. and Cameron, N. and Venn, T.                                                                                                                          |
| 131 | Biosecurity tool-set: optimising quarantine zones for eradication through consideration of Australia's success with plant pathogen eradications in horticulture | 2018 | Villalta, O. N. and Mebalds, M. and Edwards, J.                                                                                                                                                      |
| 132 | Opportunities and limitations for DNA metabarcoding in Australasian plant-pathogen biosecurity                                                                  | 2018 | Bulman, S. R. and McDougal, R. L. and Hill, K. and Lear, G.                                                                                                                                          |
| 133 | Biosecurity matters—challenges to New Zealand's biosecurity system©                                                                                             | 2017 | Hurr, K                                                                                                                                                                                              |
| 134 | Using scenario-based influence mapping to examine farmers' biosecurity behaviour                                                                                | 2017 | Maye, D. and Enticott, G. and Naylor, R.                                                                                                                                                             |
| 135 | An internet-based bioinformatics toolkit for plant biosecurity diagnosis and surveillance of viruses and viroids                                                | 2017 | Barrero, R. A. and Napier, K. R. and Cunningham, J. and Liefting, L. and Keenan, S. and Frampton, R. A. and Szabo, T. and Bulman, S. and Hunter, A. and Ward, L. and Whattam, M. and Bellgard, M. I. |
| 136 | Bulk tank milk antibody ELISA as a biosecurity tool for detecting dairy herds with past exposure to Mycoplasma bovis                                            | 2017 | Parker, A. M. and House, J. K. and Hazelton, M. S. and Bosward, K. L. and Morton, J. M. and Sheehy, R. A.                                                                                            |
| 137 | Impact of participatory training on biosecurity protocols on the knowledge, attitudes and practices of smallholder pig farmers in Uganda                        | 2017 | Dione, Michel and Amia, Winfred and Akol, Joyce and Kungu, Joseph and Lule, Peter and Mayega, Lawrence and Nyapendi, Robinah and Kakinda, Mary Jo and Ouma, Emily                                    |
| 138 | Enhancing biosecurity along Ugandas pig value chains to control and prevent African swine fever                                                                 | 2017 | Dione, Michel M and Nantima, Noelina and Mayega, Lawrence and Amia, Winfred C and Wieland, Barbara and Ouma, Emily A                                                                                 |
| 139 | Compliance/non-compliance with biosecurity rules specified in the Danish Quality Assurance system (KIK) and Campylobacter-positive broiler flocks 2012 and 2013 | 2017 | Sandberg, M and Dahl, J and Lindegaard, LL and Pedersen, JR                                                                                                                                          |
| 140 | Quantification of biosecurity status in commercial poultry farms using a scoring system                                                                         | 2017 | Chowdhury, EH and Das, PM and Islam, MR and Yamage, M                                                                                                                                                |

|     |                                                                                                                                                                         |      |                                                                                                                                                                                                                                                                                                                  |
|-----|-------------------------------------------------------------------------------------------------------------------------------------------------------------------------|------|------------------------------------------------------------------------------------------------------------------------------------------------------------------------------------------------------------------------------------------------------------------------------------------------------------------|
| 141 | Engaging with risk (or not): shared responsibility for biosecurity surveillance and the role of community gardens                                                       | 2017 | Curnock, M. and Farbotko, C. and Collins, K. and Robinson, C. J. and Maclean, K.                                                                                                                                                                                                                                 |
| 142 | Microorganisms: Good or Evil, MIRRI Provides Biosecurity Awareness                                                                                                      | 2017 | Smith, D. and Martin, D. and Novossiolova, T.                                                                                                                                                                                                                                                                    |
| 143 | Priorities for Australias biosecurity system: An independent review of the capacity of the national biosecurity system and its underpinning Intergovernmental Agreement | 2017 | Craik, Wendy and Palmer, David and Sheldrake, Richard                                                                                                                                                                                                                                                            |
| 144 | Year 1 Report: Valuing Australia's Biosecurity System, CEBRA Project 1607A-Milestone 6                                                                                  | 2017 | Dodd, A and Spring, D and Schneider, K and Hafi, A and Fraser, H and Kompas, T                                                                                                                                                                                                                                   |
| 145 | Balancing collaboration with coordination: Contesting eradication in the Australian plant pest and disease biosecurity system                                           | 2017 | McAllister, R. R. J. and Robinson, C. J. and Brown, A. and Maclean, K. and Perry, S. and Liu, S.                                                                                                                                                                                                                 |
| 146 | Australian plant biosecurity surveillance systems                                                                                                                       | 2017 | Anderson, C. and Low-Choy, S. and Whittle, P. and Taylor, S. and Gambley, C. and Smith, L. and Gillespie, P. and Locker, H. and Davis, R. and Dominiak, B.                                                                                                                                                       |
| 147 | Knowledge brokering in biosecurity: How international linkages and learnings can help us build a better system                                                          | 2017 | Lye, J.                                                                                                                                                                                                                                                                                                          |
| 148 | Zero-tolerance biosecurity protects high-conservation-value island nature reserve                                                                                       | 2017 | Scott, J. K. and McKirdy, S. J. and van der Merwe, J. and Green, R. and Burbidge, A. A. and Pickles, G. and Hardie, D. C. and Morris, K. and Kendrick, P. G. and Thomas, M. L. and Horton, K. L. and O'Connor, S. M. and Downs, J. and Stoklosa, R. and Lagdon, R. and Marks, B. and Nairn, M. and Mengersen, K. |
| 149 | Helping local industries help themselves in a multi-level biosecurity world - Dealing with the impact of horticultural pests in the trade arena                         | 2017 | Kruger, H.                                                                                                                                                                                                                                                                                                       |
| 150 | Prioritizing plant eradication targets by re-framing the project prioritization protocol (PPP) for use in biosecurity applications                                      | 2017 | Dodd, A. J. and Ainsworth, N. and Hauser, C. E. and Burgman, M. A. and McCarthy, M. A.                                                                                                                                                                                                                           |
| 151 | Early warning system in Tunisia: evolution, challenges and role of laboratory, biosecurity, environment and modeling of infectious diseases                             | 2017 | Alaya, Nissaf Bouafif Ben and Bellali, HÃ©dia and Nachtnebel, Matthias and Hollenweger, Lilian and KÃ¼kali, Dilan and Allani, Riadh                                                                                                                                                                              |
| 152 | Biosecurity 2025: Direction Statement for New Zealands Biosecurity System                                                                                               | 2016 | Ministry for Primary Industries                                                                                                                                                                                                                                                                                  |
| 153 | The role and challenges of new diagnostic technology in plant biosecurity                                                                                               | 2016 | Mumford, R. A. and Macarthur, R. and Boonham, N.                                                                                                                                                                                                                                                                 |
| 154 | Biosecurity and food security-effective mechanisms for public-private partnerships                                                                                      | 2016 | Fraser, G.                                                                                                                                                                                                                                                                                                       |

|     |                                                                                                                                                                                      |      |                                                                                                                                                        |
|-----|--------------------------------------------------------------------------------------------------------------------------------------------------------------------------------------|------|--------------------------------------------------------------------------------------------------------------------------------------------------------|
| 155 | DNA barcoding for biosecurity: case studies from the UK plant protection program                                                                                                     | 2016 | Hodgetts, J. and Ostoj i-Starzewski, J. C. and Prior, T. and Lawson, R. and Hall, J. and Boonham, N.                                                   |
| 156 | Market instruments, biosecurity and place-based understandings of animal disease                                                                                                     | 2016 | Enticott, G.                                                                                                                                           |
| 157 | Field application of a combined pig and poultry market chain and risk pathway analysis within the Pacific Islands region as a tool for targeted disease surveillance and biosecurity | 2016 | Brioudes, A. and Gummow, B.                                                                                                                            |
| 158 | Trade liberalisation and Australian biosecurity: opportunities and challenges under the “shared responsibility” approach                                                             | 2016 | Richards, Carol and Higgins, Vaughan                                                                                                                   |
| 159 | Acanthaster planci invasions: applying biosecurity practices to manage a native boom and bust coral pest in Australia                                                                | 2016 | Hoey, J. and Campbell, M. L. and Hewitt, C. L. and Gould, B. and Bird, R.                                                                              |
| 160 | Ornamental Fish Importation-Australia's New Approach to Managing Biosecurity Risks                                                                                                   | 2016 | Hood, Yuko and Perera, Ramesh Poshitha                                                                                                                 |
| 161 | Treasure Islands: biosecurity in the Hauraki Gulf Marine Park                                                                                                                        | 2016 | Bassett, I. E. and Cook, J. and Buchanan, F. and Russell, J. C.                                                                                        |
| 162 | The biosecurity approach. A review and evaluation of its application by FAO, internationally and in various countries.                                                               | 2016 | FAO                                                                                                                                                    |
| 163 | How social and citizen science help challenge the limits of the biosecurity approach: the case of ash dieback                                                                        | 2015 | Tsouvalis, Judith                                                                                                                                      |
| 164 | Bayesian Estimation for Diagnostic Testing of Biosecurity Risk Material in the Absence of a Gold Standard when Test Data are Incomplete                                              | 2015 | Clarke, S. J. and Jones, S. A.                                                                                                                         |
| 165 | Improving Smallholder Farmer Biosecurity in the Mekong Region Through Change Management                                                                                              | 2015 | Young, J. R. and Evans-Kocinski, S. and Bush, R. D. and Windsor, P. A.                                                                                 |
| 166 | Risk assessment as a tool for improving external biosecurity at farm level                                                                                                           | 2015 | Lewerin, S. S. and Osterberg, J. and Alenius, S. and Elvander, M. and Fellstrom, C. and Traven, M. and Wallgren, P. and Waller, K. P. and Jacobson, M. |
| 167 | An ecohealth assessment of poultry production clusters (PPCs) for the livelihood and biosecurity improvement of small poultry producers in Asia                                      | 2015 | Wang, L. B. and Basuno, E. and Nguyen, T. and Aengwanich, W. and Ilham, N. and Li, X. Y.                                                               |
| 168 | Biosecurity and the multiplication of crises in the Egyptian agri-food industry                                                                                                      | 2015 | Dixon, M. W.                                                                                                                                           |
| 169 | The Marine Biosecurity Porthole—a web-based information system on non-indigenous marine species in New Zealand                                                                       | 2015 | Seaward, Kimberley and Acosta, Hernando and Inglis, Graeme J and Wood, Brent and Riding, Timothy AC and Wilkens, Serena and Gould, Brendan             |

|     |                                                                                                                                                                      |      |                                                                                                                  |
|-----|----------------------------------------------------------------------------------------------------------------------------------------------------------------------|------|------------------------------------------------------------------------------------------------------------------|
| 170 | A risk based approach to non-native species management and biosecurity planning                                                                                      | 2015 | Shucksmith, Rachel J and Shelmerdine, Richard L                                                                  |
| 171 | A standardized approach for meeting national and international aquaculture biosecurity requirements for preventing, controlling, and eradicating infectious diseases | 2015 | Palić, Dušan; Scarfe, A David; Walster, Christopher I;                                                           |
| 172 | Diseases of livestock in the Pacific Islands region: Setting priorities for food animal biosecurity                                                                  | 2015 | Brioude, A. and Warner, J. and Hedlefs, R. and Gummow, B.                                                        |
| 173 | Biosecurity and disease management in China's animal agriculture sector                                                                                              | 2015 | Wei, X. J. and Lin, W. L. and Hennessy, D. A.                                                                    |
| 174 | The Australian quarantine and biosecurity legislation: Constitutionality and critique                                                                                | 2015 | Gray, A.                                                                                                         |
| 175 | Is Australia's national biosecurity system and the underpinning Intergovernmental Agreement on Biosecurity fit for the future? Discussion Paper                      | 2015 | Craik, Wendy; Palmer, David; Sheldrake, Richard;                                                                 |
| 176 | Autonomous surveillance for biosecurity                                                                                                                              | 2015 | Jurdak, R. and Elfes, A. and Kusy, B. and Tews, A. and Hu, W. and Hernandez, E. and Kottege, N. and Sikka, P.    |
| 177 | New Zealand's "Emerging Risks System" for biosecurity                                                                                                                | 2015 | Clark, S and Newfield, M and Reed, C                                                                             |
| 178 | Keeping 'one step ahead' of invasive species: using an integrated framework to screen and target species for detailed biosecurity risk assessment                    | 2015 | Singh, S. K. and Ash, G. J. and Hodda, M.                                                                        |
| 179 | Biosecurity in the beef herd                                                                                                                                         | 2014 | Sibley, D.                                                                                                       |
| 180 | A multidisciplinary policy approach to food and agricultural biosecurity and defense                                                                                 | 2014 | McClaskey, Jackie M                                                                                              |
| 181 | An online risk-based biosecurity scoring system for pig farms                                                                                                        | 2014 | Dewulf, J                                                                                                        |
| 182 | Global program for Avian Influenza control and human pandemic preparedness and response: project accomplishments                                                     | 2014 | Jonas, Olga and Warford, Lucas                                                                                   |
| 183 | Intervention to improve biosecurity system of poultry production clusters (PPCs) in Thailand                                                                         | 2014 | Aengwanich, Worapol and Boonsorn, Thongchai and Srikot, Prayat                                                   |
| 184 | Biocheck.UGent: a quantitative tool to measure biosecurity at broiler farms and the relationship with technical performances and antimicrobial use                   | 2014 | Gelaude, P. and Schlepers, M. and Verlinden, M. and Laanen, M. and Dewulf, J.                                    |
| 185 | Biosecurity system in Malaysian fisheries: Gearing up for safe and quality seafood                                                                                   | 2014 | Raja Sekaran, Hemalatha                                                                                          |
| 186 | Biosecurity Status of Food and Agriculture in Nepal                                                                                                                  | 2014 | FAO                                                                                                              |
| 187 | Balancing bioenergy and biosecurity policies: estimating current and future climate suitability patterns for a bioenergy crop                                        | 2014 | Kriticos, D. J. and Murphy, H. T. and Jovanovic, T. and Taylor, J. and Herr, A. and Raison, J. and O'Connell, D. |

|     |                                                                                                                                                       |      |                                                                                                                                                                     |
|-----|-------------------------------------------------------------------------------------------------------------------------------------------------------|------|---------------------------------------------------------------------------------------------------------------------------------------------------------------------|
| 188 | Plant biosecurity policy-making modelled on the human immune system: What would it look like?                                                         | 2014 | Cook, D. C. and Kristensen, N. P. and Liu, S. and Paini, D. R. and Kerr, P. J. and Sheppard, A. W. and Lonsdale, W. M. and McAllister, R. R. J. and De Barro, P. J. |
| 189 | A community-based education trial to improve backyard poultry biosecurity in rural Cambodia                                                           | 2013 | Conan, A. and Ponsich, A. and Goutard, F. L. and Khiev, R. and Tarantola, A. and Sorn, S. and Vong, S.                                                              |
| 190 | Popular Backyard Flock program reduces biosecurity risks of amateur production                                                                        | 2013 | Stinson, S. and Mete, A.                                                                                                                                            |
| 191 | Something in the water: biosecurity monitoring of ornamental fish imports using environmental DNA                                                     | 2013 | Collins, R. A. and Armstrong, K. F. and Holyoake, A. J. and Keeling, S.                                                                                             |
| 192 | Using internet intelligence to manage biosecurity risks: a case study for aquatic animal health                                                       | 2013 | Lyon, A. and Grossel, G. and Burgman, M. and Nunn, M.                                                                                                               |
| 193 | On the efficacy of current biosecurity measures at EU borders to prevent the transfer of zoonotic and livestock diseases by travellers                | 2013 | Noordhuizen, J. and Surborg, H. and Smulders, F. J. M.                                                                                                              |
| 194 | A method for designing complex biosecurity surveillance systems: detecting non-indigenous species of invertebrates on Barrow Island                   | 2013 | Whittle, P. J. L. and Stoklosa, R. and Barrett, S. and Jarrad, F. C. and Majer, J. D. and Martin, P. A. J. and Mengersen, K.                                        |
| 195 | Extension Education Symposium: The future of biosecurity and antimicrobial use in livestock production in the United States and the role of extension | 2012 | Clark, S. and Daly, R. and Jordan, E. and Lee, J. and Mathew, A. and Ebner, P.                                                                                      |
| 196 | Creating Situational Awareness: A Systems Approach. Baltimore, MD: Center for Biosecurity of UPMC; 2009                                               | 2012 | Toner, ES                                                                                                                                                           |
| 197 | Thomson Aberfeldy Demonstration Siteâ€”a strategic weed project. Implementing Victoriaâ€™s biosecurity approach to pest management on public land     | 2012 | Gillespie, Penny and James, Rebecca and Lambourne, Sally                                                                                                            |
| 198 | Barcoding and border biosecurity: identifying cyprinid fishes in the aquarium trade                                                                   | 2012 | Collins, R. A. and Armstrong, K. F. and Meier, R. and Yi, Y. and Brown, S. D. and Cruickshank, R. H. and Keeling, S. and Johnston, C.                               |
| 199 | Improvement in Smallholder Farmer Knowledge of Cattle Production, Health and Biosecurity in Southern Cambodia between 2008 and 2010                   | 2012 | Nampanya, S. and Suon, S. and Rast, L. and Windsor, P. A.                                                                                                           |
| 200 | Use of stakeholder analysis to inform risk communication and extension strategies for improved biosecurity amongst small-scale pig producers          | 2012 | Hernandez-Jover, M. and Gilmour, J. and Schembri, N. and Sysak, T. and Holyoake, P. K. and Beilin, R. and Toribio, Jalml                                            |
| 201 | Marine biosecurity: the importance of awareness, support and cooperation in managing a successful incursion response                                  | 2012 | Piola, R. F. and McDonald, J. I.                                                                                                                                    |

|     |                                                                                                                                                      |      |                                                                                                  |
|-----|------------------------------------------------------------------------------------------------------------------------------------------------------|------|--------------------------------------------------------------------------------------------------|
| 202 | Biosecurity against invasive alien insect pests: A case study of <i>Chilo sacchariphagus</i> (Lepidoptera: Crambidae) in the southern African region | 2012 | Way, M. J. and Conlong, D. E. and Rutherford, R. S.                                              |
| 203 | GMP+ FSA scheme as part of the integrated system for providing biosecurity in animal production                                                      | 2012 | Žikić, D; Ušćebrka, G; Stojanović, S; Kanački, Z;                                                |
| 204 | 'Getting the biosecurity architecture right' in the Asia-Pacific region                                                                              | 2012 | Minehata, M.                                                                                     |
| 205 | People, pathogens and our planet: the economics of one health                                                                                        | 2012 | World Bank                                                                                       |
| 206 | From biodefence to biosecurity: the Obama administration's strategy for countering biological threats                                                | 2012 | Koblentz, G. D.                                                                                  |
| 207 | Governing biosecurity in a neoliberal world: comparative perspectives from Australia and the United Kingdom                                          | 2012 | Maye, D. and Dibden, J. and Higgins, V. and Potter, C.                                           |
| 208 | The Quarantine Chain: Establishing an Effective Biosecurity System to Prevent the Introduction of Invasive Species Into the Galapagos Islands        | 2012 | Bigue, Marcel                                                                                    |
| 209 | Reform of Australia's Biosecurity System: New Biosecurity Legislation                                                                                | 2012 | Biosecurity, DAFF                                                                                |
| 210 | Comparison of web-based biosecurity intelligence systems: BioCaster, EpiSPIDER and HealthMap                                                         | 2012 | Lyon, A. and Nunn, M. and Grossel, G. and Burgman, M.                                            |
| 211 | Biosecurity Incident Management System V1.0, 29 October 2012                                                                                         | 2012 | Group, Biosecurity Emergency Preparedness Working                                                |
| 212 | Biosecurity Policy and the Use of Geospatial Predictive Tools to Address Invasive Plants: Updating the Risk Analysis Toolbox                         | 2012 | Lindgren, C. J.                                                                                  |
| 213 | Biosecurity of kiwifruit plants: effects of internal microchip implants on vines for monitoring plant health status                                  | 2012 | Luvisi, A. and Panattoni, A. and Bandinelli, R. and Rinaldelli, E. and Pagano, M. and Triolo, E. |
| 214 | Integrating surveillance and biosecurity activities to achieve efficiencies in national avian influenza programs                                     | 2011 | Bunn, D. and Beltran-Alcrudo, D. and Cardona, C.                                                 |
| 215 | Embryo transfer: a comparative biosecurity advantage in international movements of germplasm                                                         | 2011 | Thibier, M.                                                                                      |
| 216 | Biosecurity and vaccination strategies to minimise the effect of an equine influenza outbreak on racing and breeding                                 | 2011 | Arthur, R. J. and Suann, C. J.                                                                   |
| 217 | Quantification of biosecurity status in pig herds using an online scoring system                                                                     | 2011 | Laanen, M and Ribbens, S and Maes, D and Dewulf, J and KÄ¶fer, J.; Schobesberger, H.             |
| 218 | A review of international, regional and national biosecurity risk assessment frameworks                                                              | 2011 | Dahlstrom, A. and Hewitt, C. L. and Campbell, M. L.                                              |
| 219 | International and national biosecurity strategies in aquatic animal health                                                                           | 2011 | Oidtmann, B. C. and Thrush, M. A. and Denham, K. L. and Peeler, E. J.                            |



|     |                                                                                                                                                                 |      |                                                                                                                                                                                           |
|-----|-----------------------------------------------------------------------------------------------------------------------------------------------------------------|------|-------------------------------------------------------------------------------------------------------------------------------------------------------------------------------------------|
| 220 | Using a Community Approach to Foster Effective Biosecurity Practices Across Social Borders                                                                      | 2011 | Royce, Paul                                                                                                                                                                               |
| 221 |                                                                                                                                                                 | 2011 | FAO                                                                                                                                                                                       |
| 222 | The environmental and biosecurity characteristics of livestock carcass disposal methods: A review                                                               | 2011 | Gwyther, C. L. and Williams, A. P. and Golyshin, P. N. and Edwards-Jones, G. and Jones, D. L.                                                                                             |
| 223 | Harmonising the Governance of Farming Risks: agricultural biosecurity and biotechnology in Australia                                                            | 2011 | Dibden, J. and Higgins, V. and Cocklin, C.                                                                                                                                                |
| 224 | Biosecurity, risk and policy: a New Zealand perspective                                                                                                         | 2011 | Goldson, S. L.                                                                                                                                                                            |
| 225 | Implementing Information System Innovations to Manage Biosecurity Issues in Australian Food NetChains                                                           | 2011 | Storer, Christine and Noonan, John and Murray-Prior, Roy and Batt, Peter                                                                                                                  |
| 226 | Attitudes towards biosecurity practices relevant to Johne's disease control on beef cattle farms                                                                | 2010 | Benjamin, L. A. and Fosgate, G. T. and Ward, M. P. and Roussel, A. J. and Feagin, R. A. and Schwartz, A. L.                                                                               |
| 227 | Biosecurity in the dairy herd                                                                                                                                   | 2010 | Sibley, R.                                                                                                                                                                                |
| 228 | Biosecurity on pig herds: Development of an on-line scoring system and the results of the first 99 participating herds                                          | 2010 | Laanen, M. and Beek, J. and Ribbens, S. and Vangroenweghe, F. and Maes, D. and Dewulf, J.                                                                                                 |
| 229 | Good practices for biosecurity in the pig sector - Issues and options in developing and transition countries                                                    | 2010 | FAO, OIE, World Bank                                                                                                                                                                      |
| 230 | Implementing poultry vaccination and biosecurity at the village level in Tanzania: a social strategy to promote health in free-range poultry populations        | 2010 | Msoffe, P. L. M. and Bunn, D. and Muhairwa, A. P. and Mtambo, M. M. A. and Mwamhehe, H. and Msago, A. and Mlozi, M. R. S. and Cardona, C. J.                                              |
| 231 | UAE poultry farm premises ID and biosecurity                                                                                                                    | 2010 | Fadel, M. A. and Hussein, A. S.                                                                                                                                                           |
| 232 | Xylella fastidiosa: a model for analyzing agricultural biosecurity                                                                                              | 2010 | Ancona, V. and Appel, D. N. and de Figueiredo, P.                                                                                                                                         |
| 233 | Towards a Global Barcode Library for Lymantria (Lepidoptera: Lymantriinae) Tussock Moths of Biosecurity Concern                                                 | 2010 | deWaard, J. R. and Mitchell, A. and Keena, M. A. and Gopurenko, D. and Boykin, L. M. and Armstrong, K. F. and Pogue, M. G. and Lima, J. and Floyd, R. and Hanner, R. H. and Humble, L. M. |
| 234 | Prioritizing Biosecurity Risks Using a Participatory Decision-Making Tool                                                                                       | 2010 | Hurley, M. V. and Lowell, K. E. and Cook, D. C. and Liu, S. A. and Siddique, A. B. and Diggle, A.                                                                                         |
| 235 | Biosecurity, Expertise and the Institutional Void: The Case of Bovine Tuberculosis                                                                              | 2009 | Enticott, G. and Franklin, A.                                                                                                                                                             |
| 236 | Successful spread of a biocontrol agent reveals a biosecurity failure: elucidating long distance invasion pathways for Gonatocerus ashmeadi in French Polynesia | 2009 | Petit, J. N. and Hoddle, M. S. and Grandgirard, J. and Roderick, G. K. and Davies, N.                                                                                                     |
| 237 | Government as biosecurity communicator: the 2006 spinach advisory                                                                                               | 2009 | Chess, C. and Reilly, M. A. and Cuite, C.                                                                                                                                                 |

|     |                                                                                                                                                                         |      |                                                                                                                                            |
|-----|-------------------------------------------------------------------------------------------------------------------------------------------------------------------------|------|--------------------------------------------------------------------------------------------------------------------------------------------|
| 238 | The role of plant biosecurity in preventing and controlling emerging plant virus disease epidemics                                                                      | 2009 | Rodoni, B.                                                                                                                                 |
| 239 | Biosecurity and risk management for dairy replacements                                                                                                                  | 2008 | Maunsell, F. and Donovan, G. A.                                                                                                            |
| 240 | Biosecurity after the event: risk politics and animal disease                                                                                                           | 2008 | Donaldson, A.                                                                                                                              |
| 241 | Biosecurity for Highly Pathogenic Avian Influenza                                                                                                                       | 2008 | FAO, OIE, World Bank                                                                                                                       |
| 242 | Development of the shrimp industry in the Western Indian Ocean-a holistic approach of vertical integration, from domestication and biosecurity to product certification | 2008 | Le Groumelec, Marc and Rigolet, Vincent and Duraisamy, Panchayuthapani and Vandeputte, Marc and Rao, Vemulapali Manavendra                 |
| 243 | National biosecurity approaches, plans and programmes in response to diseases in farmed aquatic animals: evolution, effectiveness and the way forward                   | 2008 | Hastein, I. and Binde, M. and Hine, M. and Johnsen, S. and Lillehaug, A. and Olesen, N. J. and Purvis, N. and Scarfe, A. D. and Wright, B. |
| 244 | Economic aspects of agricultural and food biosecurity                                                                                                                   | 2008 | Hennessey, D. A.                                                                                                                           |
| 245 | Testing island biosecurity systems for invasive rats                                                                                                                    | 2008 | Russell, J. C. and Beaven, B. M. and MacKay, J. W. B. and Towns, D. R. and Clout, M. N.                                                    |
| 246 | Use of data mining techniques to investigate disease risk classification as a proxy for compromised biosecurity of cattle herds in Wales                                | 2008 | Ortiz-Pelaez, A. and Pfeiffer, D. U.                                                                                                       |
| 247 | Flexible boundaries in biosecurity: accommodating gorse in Aotearoa New Zealand                                                                                         | 2008 | Barker, K.                                                                                                                                 |
| 248 | Signals come and go: syndromic surveillance and styles of biosecurity                                                                                                   | 2008 | Fearnley, L.                                                                                                                               |
| 249 | Biosafety and biosecurity: Applicabilities of the biological security                                                                                                   | 2008 | Cardoso, Tado and Navarro, Mbmda and Soares, B. E. C. and Tapajos, A. M.                                                                   |
| 250 | The practice of biosecurity in Canada: public health legal preparedness and Toronto's SARS crisis                                                                       | 2008 | Van Wagner, E.                                                                                                                             |
| 251 | Biosecurity: Educational programs                                                                                                                                       | 2007 | Bradley, F. A.                                                                                                                             |
| 252 | Mechanisms for the prevention of marine bioinvasions for better biosecurity                                                                                             | 2007 | Hewitt, C. L. and Campbell, M. L.                                                                                                          |
| 253 | Development of an analytical tool to assess Biosecurity legislation                                                                                                     | 2007 | Manzella, Daniele and Vapnek, Jessica                                                                                                      |
| 254 | Advances in biosecurity to 2010 and beyond: towards integrated detection, analysis and response to exotic pest invasions                                                | 2007 | French, N. P. and Gemmell, N. J. and Buddle, B. M.                                                                                         |
| 255 | Enhancing control of highly pathogenic avian influenza in developing countries through compensation: issues and good practice                                           | 2006 | Hristov, Manush A and Bank, World                                                                                                          |
| 256 | Canadas approach to aquatic animal biosecurity: experience and evolution                                                                                                | 2006 | McGladdery, Sharon E and Zurbrigg, Richard E                                                                                               |

|     |                                                                                                                                                              |      |                                                                                                                     |
|-----|--------------------------------------------------------------------------------------------------------------------------------------------------------------|------|---------------------------------------------------------------------------------------------------------------------|
| 257 | Allocating Vote: Biosecurity-towards an economics-based approach for setting priorities for the importation of goods                                         | 2006 | Ryan, M                                                                                                             |
| 258 | Biosecurity Awareness and Peri-Urban Landholders: a case study approach                                                                                      | 2005 | Aslin, Heather J and Mazur, N                                                                                       |
| 259 | An integrated approach to biosecurity on UK cattle and sheep farms; evaluating existing measures for endemic diseases against exotic threatsâ€™Extensionâ€™™ | 2004 | DEFRA                                                                                                               |
| 260 | New Zealand marine biosecurity: delivering outcomes in a fluid environment                                                                                   | 2004 | Hewitt, C. L. and Willing, J. and Bauckham, A. and Cassidy, A. M. and Cox, C. M. S. and Jones, L. and Wotton, D. M. |
| 261 | Using Web-Based Distance Diagnostic and Identification System a Tool for Biosecurity                                                                         | 2003 | Xin, Jiannong and Momol, MT and Sprenkel, RK and Beck, Howard W and Zazueta, FS and Vergot, P and Wisler, GC        |
| 262 | Symposium: Agro-terrorism: Biological threats and biosecurity measures - Food security issues - A potential comprehensive plan                               | 2003 | Norton, R. A.                                                                                                       |
| 263 | MiTAP for biosecurity - A case study                                                                                                                         | 2002 | Damianos, L. and Ponte, J. and Wohlever, S. and Reeder, F. and Day, D. and Wilson, G. and Hirschman, L.             |
| 264 | Biosecurity: Moving toward a comprehensive approach                                                                                                          | 2002 | Meyerson, L. A. and Reaser, J. K.                                                                                   |
| 265 | Dealing with the human dimensions of invasive alien species within New Zealandâ€™s biosecurity system                                                        | 2001 | Warren, Paula                                                                                                       |
| 266 | A weed risk assessment model for use as a biosecurity tool evaluating plant introductions                                                                    | 1999 | Pheloung, P. C. and Williams, P. A. and Halloy, S. R.                                                               |
